# Supplementary material for: syn-Sesquinorbornenyl carbocations and their boron analogues: an ab initio and DFT study
Source: Royal Society of Chemistry journal article supplement (doi:10.1039/b207552k), 2002-01-01
Supplement: b207552k.doc [file b207552k.doc]

**Table S1** Key structural parameters of cations **2** and **3** calculated at the B3LYP/6-31G* level of theory a

| Bond or Angle | Cation | | | | | |
| --- | --- | --- | --- | --- | --- | --- |
|  | **2a** (Cs) | **2b** (Cs) |  | **3a** (C2v) | **3b** (C2v) | **3c** (Cs) |
| C(1)-C(2) | 1.415 | 1.358 |  | 1.430 | 1.359 | 1.413 |
| C(2)-C(3) | 1.480 | 1.489 |  | 1.518 | 1.494 | 1.485 |
| C(3)-C(7) | 1.541 | 1.675 |  | 1.561 | 1.674 | 1.523 |
| C(7)-C(8) | 1.552 | 1.573 |  | 1.558 | 1.576 | 1.552 |
| C(3)-X(11) | 1.530 | 1.456 |  | 1.499 | 1.458 | 1.534 |
| C(1)-X(11) | 1.738 | 2.316 |  | 1.961 | 2.304 | 1.751 |
| C(7)-X(11) | 2.481 | 2.024 |  | 2.434 | 2.028 | 2.482 |
| C(2)-C(6) | 1.512 | 1.512 |  | 1.518 | 1.494 | 1.508 |
| C(6)-C(10) | 1.571 | 1.572 |  | 1.561 | 1.674 | 1.653 |
| C(9)-C(10) | 1.563 | 1.560 |  | 1.558 | 1.576 | 1.587 |
| C(6)-Y(12) | 1.554 | 1.557 |  | 1.499 | 1.458 | 1.458 |
| C(1)-Y(12) | 2.363 | 2.322 |  | 1.961 | 2.304 | 2.336 |
| C(9)-Y(12) | 2.401 | 2.393 |  | 2.434 | 2.028 | 2.051 |
| X(11)...Y(12) | 3.098 | 4.377 |  | 2.877 | 4.367 | 3.272 |
|  |  |  |  |  |  |  |
| C(1)-C(2)-C(3) | 109.3 | 109.4 |  | 108.1 | 109.5 | 109.4 |
| C(2)-C(3)-C(7) | 117.3 | 107.5 |  | 109.9 | 108.7 | 117.1 |
| C(2)-C(3)-X(11) | 70.5 | 103.7 |  | 81.1 | 102.6 | 70.9 |
| C(3)-X(11)-C(4) | 102.9 | 107.3 |  | 104.8 | 108.0 | 102.9 |
| C(1)-C(2)-C(6) | 106.9 | 108.0 |  | 108.1 | 109.5 | 108.3 |
| C(2)-C(6)-C(10) | 103.2 | 106.8 |  | 109.9 | 108.7 | 105.3 |
| C(2)-C(6)-Y(12) | 100.8 | 98.3 |  | 81.1 | 102.6 | 103.9 |
| C(6)-Y(12)-C(5) | 95.3 | 95.0 |  | 104.8 | 108.0 | 108.2 |
| ** | 82.7 | 154.2 |  | 99.1 | 151.9 | 83.4 |
| **1 | 128.8 | 125.5 |  | 99.1 | 151.9 | 153.0 |
| ** | 150.1 | 91.5 |  | 143.5 | 92.3 | 149.5 |
| **1 | 122.7 | 121.4 |  | 143.5 | 92.3 | 95.5 |
| ** | -16.1 | 13.8 |  | -16.9 | 6.5 | -17.1 |
|  |  |  |  |  |  |  |

*a* All distances are in Å and angles in deg; the numbering scheme is shown on Scheme 1.

**Table S2** Key structural parameters of boron compounds **4**, **5** and **6** calculated at the B3LYP/6-31G* level of theory a

| Bond or Angle | Boron compound | | | | | | |
| --- | --- | --- | --- | --- | --- | --- | --- |
|  | **4** (Cs) |  | **5** (C2v) |  | **6a** (Cs) | **6b** (Cs) | **6c** (Cs) |
| C(1)-C(2) | 1.396 |  | 1.412 |  | 1.429 | 1.422 | 1.403 |
| C(2)-C(3) | 1.471 |  | 1.501 |  | 1.491 | 1.482 | 1.506 |
| C(3)-C(7) | 1.545 |  | 1.552 |  | 1.544 | 1.540 | 1.648 |
| C(7)-C(8) | 1.554 |  | 1.558 |  | 1.554 | 1.552 | 1.586 |
| C(3)-X(11) | 1.632 |  | 1.603 |  | 1.516 | 1.527 | 1.456 |
| C(1)-X(11) | 1.791 |  | 2.001 |  | 1.803 | 1.745 | 2.339 |
| C(7)-X(11) | 2.571 |  | 2.523 |  | 2.464 | 2.479 | 2.046 |
| C(2)-C(6) | 1.521 |  | 1.501 |  | 1.504 | 1.499 | 1.468 |
| C(6)-C(10) | 1.566 |  | 1.552 |  | 1.570 | 1.594 | 1.545 |
| C(9)-C(10) | 1.565 |  | 1.558 |  | 1.560 | 1.572 | 1.552 |
| C(6)-Y(12) | 1.552 |  | 1.603 |  | 1.606 | 1.594 | 1.641 |
| C(1)-Y(12) | 2.364 |  | 2.001 |  | 2.219 | 2.409 | 1.802 |
| C(9)-Y(12) | 2.393 |  | 2.523 |  | 2.470 | 2.261 | 2.574 |
| X(11)...Y(12) | 3.185 |  | 2.838 |  | 2.891 | 3.197 | 3.318 |
|  |  |  |  |  |  |  |  |
| C(1)-C(2)-C(3) | 111.4 |  | 109.9 |  | 108.6 | 109.0 | 108.2 |
| C(2)-C(3)-C(7) | 115.5 |  | 110.7 |  | 115.7 | 117.5 | 106.2 |
| C(2)-C(3)-X(11) | 70.3 |  | 80.2 |  | 73.7 | 70.9 | 104.3 |
| C(3)-X(11)-C(4) | 98.2 |  | 98.7 |  | 103.5 | 102.9 | 107.4 |
| C(1)-C(2)-C(6) | 106.9 |  | 109.9 |  | 109.2 | 109.4 | 111.4 |
| C(2)-C(6)-C(10) | 105.1 |  | 110.7 |  | 105.9 | 104.4 | 115.6 |
| C(2)-C(6)-Y(12) | 100.6 |  | 80.2 |  | 91.0 | 102.3 | 70.6 |
| C(6)-Y(12)-C(5) | 94.6 |  | 98.7 |  | 97.7 | 98.7 | 97.9 |
| ** | 84.2 |  | 98.3 |  | 87.0 | 82.9 | 152.6 |
| **1 | 127.8 |  | 98.3 |  | 115.3 | 139.1 | 84.7 |
| ** | 148.6 |  | 141.9 |  | 148.2 | 149.9 | 95.0 |
| **1 | 121.6 |  | 141.9 |  | 131.1 | 109.3 | 147.8 |
| ** | -10.2 |  | -14.5 |  | -18.5 | -17.5 | -13.3 |
|  |  |  |  |  |  |  |  |

*a* All distances are in Å and angles in deg; the numbering scheme is shown on Scheme 1.
